# Supplementary material
Source: Springer Nature journal article supplement (https://www.springermedizin.de/resource/supplementary/13005_2013_386_MOESM3_ESM.pdf/9625978)

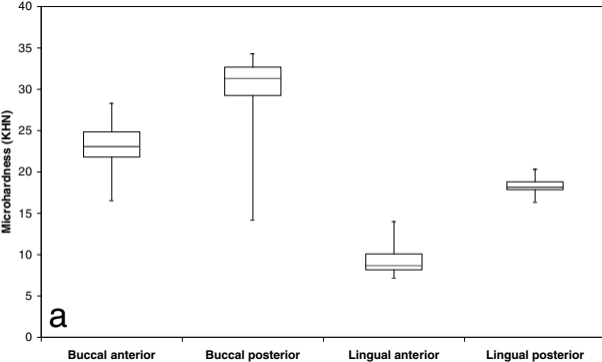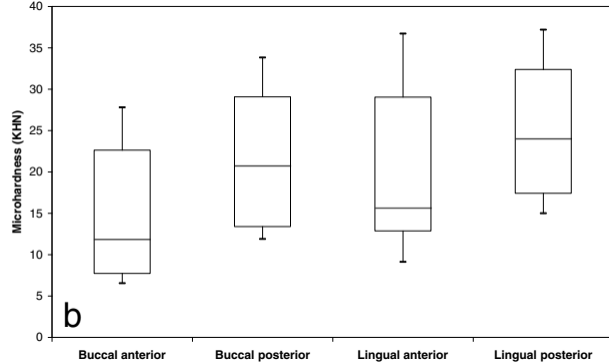

Supplement: MOESM3 [file 9625978]
